# Supplementary material for: Valorization of brewing by-products: obtaining flavor-enhancing and antioxidant compounds from spent yeast
Source: Royal Society of Chemistry journal article supplement (doi:10.1039/d5fb00499c), 2025-12-16
Supplement: d5fb00499c1.pdf [file d5fb00499c1.pdf]

**Table S1. Descriptors used to characterize the BSY extracts**

| <b>Descriptor</b>       | <b>Definition</b>                                                                                                                                 | <b>Anchor points</b>               |
|-------------------------|---------------------------------------------------------------------------------------------------------------------------------------------------|------------------------------------|
| <b>Yeast Smell</b>      | Sensation perceived by means of the olfactory organ in sniffing certain volatile substances characteristics of yeast.                             | 1 = almost nothing<br>9 = a lot    |
| <b>Color perception</b> | Sensation of hue, saturation and lightness induced by stimulation of the retina by light rays of various wavelengths.                             | 1 = light yellow<br>9 = dark brown |
| <b>Umami taste</b>      | Basic taste produced by dilute aqueous solutions of a certain kind of amino acid or nucleotide such as monosodium glutamate or disodium inosinate | 1 = almost nothing<br>9 = a lot    |
| <b>Bitter Taste</b>     | Basic taste produced by dilute aqueous solutions of various substances such as quinine or caffeine                                                | 1 = almost nothing<br>9 = a lot    |
| <b>Pungency</b>         | Sharp sensation of the oral and nasal mucous membranes                                                                                            | 1 = almost nothing<br>9 = a lot    |
| <b>Residual flavor</b>  | Olfactory and/or gustatory sensation that occurs after the elimination of the product.                                                            | 1 = almost nothing<br>9 = a lot    |

**Table S2.** Statistical analysis and model coefficients of each response related with chemical composition of BSY extracts obtained by the experimental design

|                       | <b>Solids</b> | <b>Protein</b> | <b>DH</b>     | <b>Glutamic acid</b> | <b>RNA</b> | <b>FG</b> | <b>BG</b>     |
|-----------------------|---------------|----------------|---------------|----------------------|------------|-----------|---------------|
| Model                 | L             | NS             | L             | L                    | NS         | NS        | L             |
| Model p-value         | <b>0.0026</b> |                | <b>0.0009</b> | <b>0.0024</b>        |            |           | <b>0.0030</b> |
| R-Squared             | 0.6543        |                | 0.8257        | 0.6603               |            |           | 0.6425        |
| Adj R-Squared         | 0.6159        |                | 0.7822        | 0.6226               |            |           | 0.6028        |
| Lack of fit (p-value) | <b>0.2302</b> |                | <b>0.4788</b> | <b>0.8482</b>        |            |           | <b>0.4800</b> |
| Intercept             | 3.62          |                | -24.07        | 5.33                 |            |           | 3.46          |
| Coef Temperature (T)  |               |                | 0.78          |                      |            |           |               |
| Coef Time (t)         | 0.05          |                | 1.15          | 0.26                 |            |           | -0.04         |
| Coef T*t              |               |                |               |                      |            |           |               |
| Coef T <sup>2</sup>   |               |                |               |                      |            |           |               |
| Coef t <sup>2</sup>   |               |                |               |                      |            |           |               |

L: lineal model; FAG: free amino groups; DH: protein degree of hydrolysis; FG: free glucose; BG: bound glucose; NS non- significant

**Table S3.** Responses related with bioactive compounds and antioxidant activity of BSY extracts obtained by the experimental design

|                        | <b>GABA</b>        | <b>Taurine</b>     | <b>PA</b>          | <b>4HBA</b> | <b>CA</b>   | <b>VA</b>   | <b>FA</b>               |
|------------------------|--------------------|--------------------|--------------------|-------------|-------------|-------------|-------------------------|
| Model                  | L                  | L                  | I                  | NS          | Q           | NS          | NS                      |
| Model p-value          | 0.0326             | 0.0003             | 0.0466             |             | 0.0004      |             |                         |
| R-Squared              | 0.5750             | 0.8671             | 0.6581             |             | 0.9517      |             |                         |
| Adj R-Squared          | 0.4688             | 0.8339             | 0.5116             |             | 0.9195      |             |                         |
| Lack of fit (p-value)  | 0.2792             | 0.8522             | 0.4005             |             | 0.0613      |             |                         |
| Intercept              | 10.27              | -1.86              | 382.67             |             | 111.32      |             |                         |
| Coef Temperature (T)   | -0.16              | 0.11               | -5.93              |             | -1.65       |             |                         |
| Coef Time (t)          | 0.16               | 0.43               | -23.66             |             | -7.89       |             |                         |
| Coef T*t               |                    |                    | 0.55               |             | 0.09        |             |                         |
| Coef T <sup>2</sup>    |                    |                    |                    |             |             |             |                         |
| Coef t <sup>2</sup>    |                    |                    |                    |             | 0.11        |             |                         |
|                        | <b>HH peptides</b> | <b>LH peptides</b> | <b>IH peptides</b> | <b>ABTS</b> | <b>FRAP</b> | <b>DPPH</b> | <b>Copper-chelating</b> |
| Model                  | NS                 | Q                  | Q                  | L           | C           | L           | L                       |
| Model p-value          |                    | 0.0007             | 0.0001             | 0.0009      | 0.035       | 0.0016      | 0.0140                  |
| R-Squared              |                    | 0.9420             | 0.9949             | 0.7224      | 0.9641      | 0.8006      | 0.7069                  |
| Adj R-Squared          |                    | 0.9034             | 0.9884             | 0.6915      | 0.8803      | 0.7508      | 0.6521                  |
| Lack of fit (p-value)  |                    | 0.1831             | 0.9692             | 0.4944      | 0.5697      | 0.2418      | 0.2101                  |
| Intercept              |                    | 97.99              | -36.31             | 6.32        | 31.03       | 0.28        | 58.04                   |
| Coef Temperature (T)   |                    | -0.42              | 1.54               |             | -1.51       | 4.64E-3     |                         |
| Coef Time (t)          |                    | -1.73              | 3.15               | -0.06       | 5.34        | -4.29E-3    | 1.27                    |
| Coef T*t               |                    | 0.02               | -0.04              |             | -0.05       |             |                         |
| Coef T <sup>2</sup>    |                    |                    | -8.78E-3           |             | 0.04        |             |                         |
| Coef t <sup>2</sup>    |                    | 0.02               | -0.04              |             | -0.28       |             |                         |
| Coef T <sup>2</sup> *t |                    |                    |                    |             | -2.42E-3    |             |                         |
| Coef T*t <sup>2</sup>  |                    |                    |                    |             | 7.28E-3     |             |                         |

L: lineal model; I: lineal with interaction model; Q: Quadratic model; C: cubic model; NS: non significate model; GABA:  $\gamma$ -aminobutyric acid; PA: protocatechuic acid; 4HBA: 4-hydroxybenzoic acid; CA: chlorogenic acid; VA: vanillic acid; FA: ferulic acid; HH: high hydrophobicity; LH: low hydrophobicity; IH: intermediate hydrophobicity. NS non- significant

**Table S4.** Responses related with sensorial analysis of BSY extracts obtained by the experimental design

|                       | <b>Yeast smell</b> | <b>Color perception</b> | <b>Umami taste</b> | <b>Bitter taste</b> | <b>Pungency</b> | <b>Residual flavor</b> |
|-----------------------|--------------------|-------------------------|--------------------|---------------------|-----------------|------------------------|
| Model                 | I                  | Q                       | L                  | Q                   | Q               | Q                      |
| Model p-value         | 0.0003             | 0.0002                  | <0.0001            | <0.0001             | 0.0025          | 0.0004                 |
| R-Squared             | 0.9219             | 0.9845                  | 0.9481             | 0.9506              | 0.7772          | 0.9780                 |
| Adj R-Squared         | 0.8884             | 0.9691                  | 0.9352             | 0.9294              | 0.7215          | 0.9560                 |
| Lack of fit (p-value) | 0.4284             | 0.3734                  | 0.2994             | 0.5768              | 0.1566          | 0.4121                 |
| Intercept             | 6.17               | -0.84                   | 3.59               | -14.04              | 4.30            | -5.65                  |
| Coef Temperature (T)  | -1.16E-3           | +0.20                   | -0.02              | 0.81                |                 | 0.41                   |
| Coef Time (t)         | 0.21               | --0.15                  | 0.1                | 0.09                | -0.46           | -0.13                  |
| Coef T*t              | -7.22E-3           | +3.89E-3                |                    |                     |                 | -4.4E-3                |
| Coef T <sup>2</sup>   |                    | -2.23E-3                |                    | -9.8E-3             |                 | -3.9E-3                |
| Coef t <sup>2</sup>   |                    | 2.48E-3                 |                    |                     | 0.02            | 0.01                   |

L: lineal model; I: lineal with interaction model; Q: Quadratic model.
